# Supplementary material
Source: HighWire-hosted journal article supplement (http://molpharm.aspetjournals.org/highwire/filestream/77327/field_highwire_adjunct_files/0/Supplemental_information_94284.pdf)
Supplement: Supplemental_information_94284.pdf [file Supplemental_information_94284.pdf]

Mol Pharmacol

Supplemental information accompanying the manuscript

**Robust hydrolysis of prostaglandin glycerol esters by human monoacylglycerol lipase (MAGL)**

by

Juha R. Savinainen, Emilia Kansanen, Tatu Pantsar, Dina Navia-Paldanius, Teija Parkkari, Marko Lehtonen, Tuomo Laitinen, Tapio Nevalainen, Antti Poso, Anna-Liisa Levonen and Jarmo T. Laitinen

Inventory of Supplemental Information

**Supplemental Figure 1.** Chemical structures and calculated logP values of the PG-G species tested in this study.

**Supplemental Figure 2.** Location of additional hydrogen bond interaction between PGD<sub>2</sub>-G and the LID domain of hMAGL.

**Supplemental Figure 3.** No inhibition of MAGL isoforms by the 15d-PGJ<sub>2</sub>-G hydrolysis end-product 15d-PGJ<sub>2</sub>.

**Supplemental Figure 4.** Substrate availability for MAGL-catalyzed hydrolysis in incubations with or without bovine (BSA) or human serum albumin (HSA).

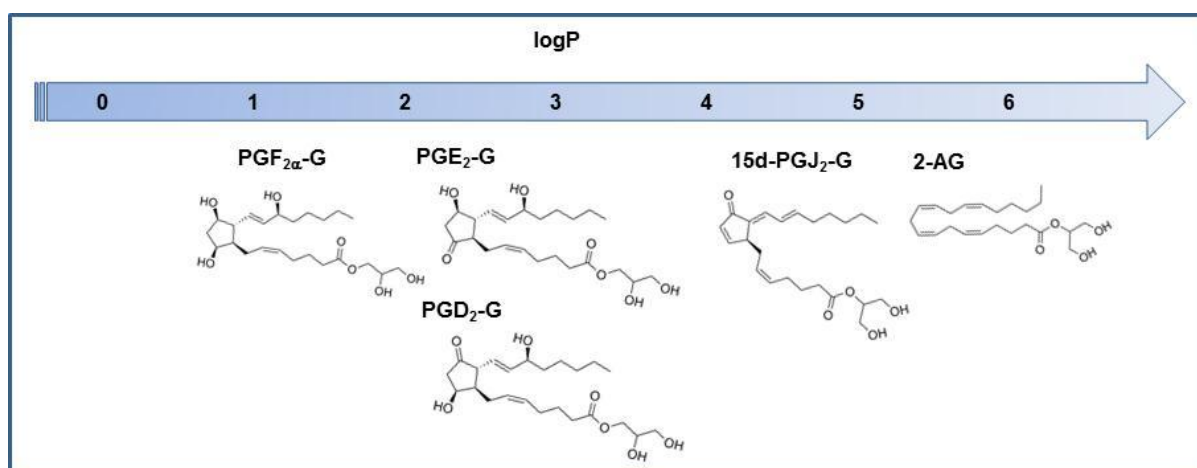

**Supplemental Figure 1.** Chemical structures and calculated logP values of the PG-G species tested in this study. The logP values were estimated using ChemAxon Marvin 6.0 software. Note that 15d-PGJ<sub>2</sub>-G represented the 2-isomer while PGD<sub>2</sub>-G, PGE<sub>2</sub>-G and PGF<sub>2α</sub>-G are 1(3)-isomers.

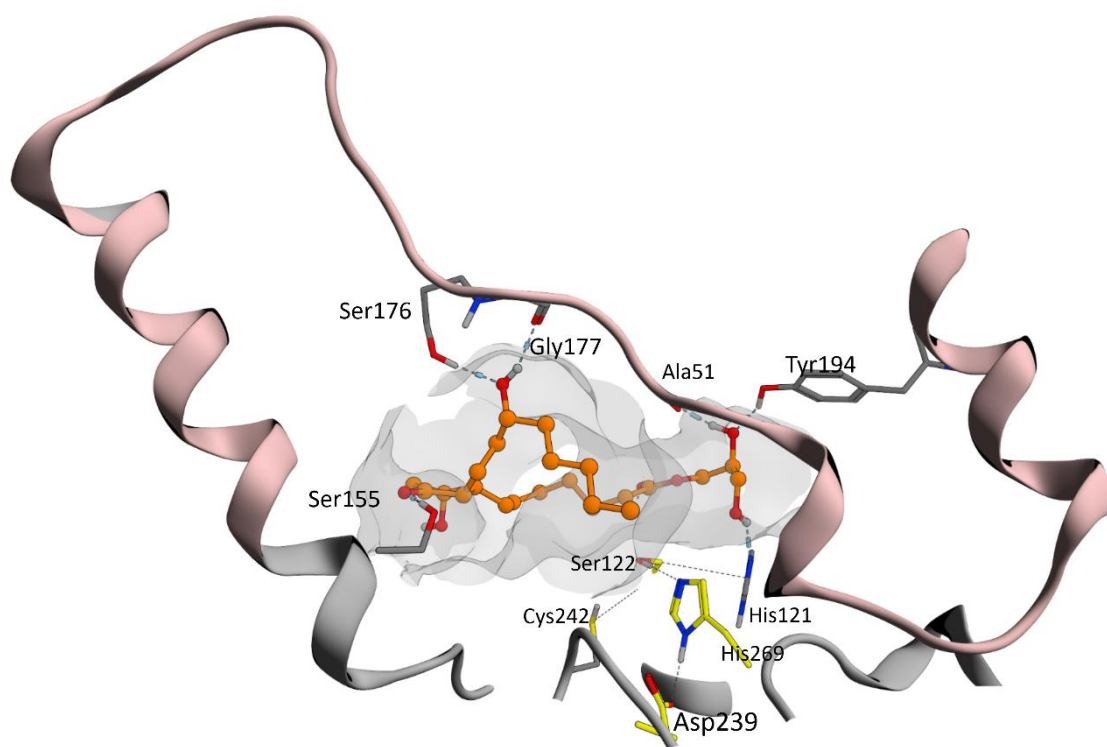

**Supplemental Figure 2.** Location of additional hydrogen bond interaction between PGD<sub>2</sub>-G (orange) and the LID domain of hMAGL (pink). The view is from the direction of the substrate access site. In contrast to PGD<sub>2</sub>, 15d-PGJ<sub>2</sub>-G is unable to form additional hydrogen bonds between the 15d-PGJ<sub>2</sub> moiety and the lid domain (see Figure 5A).

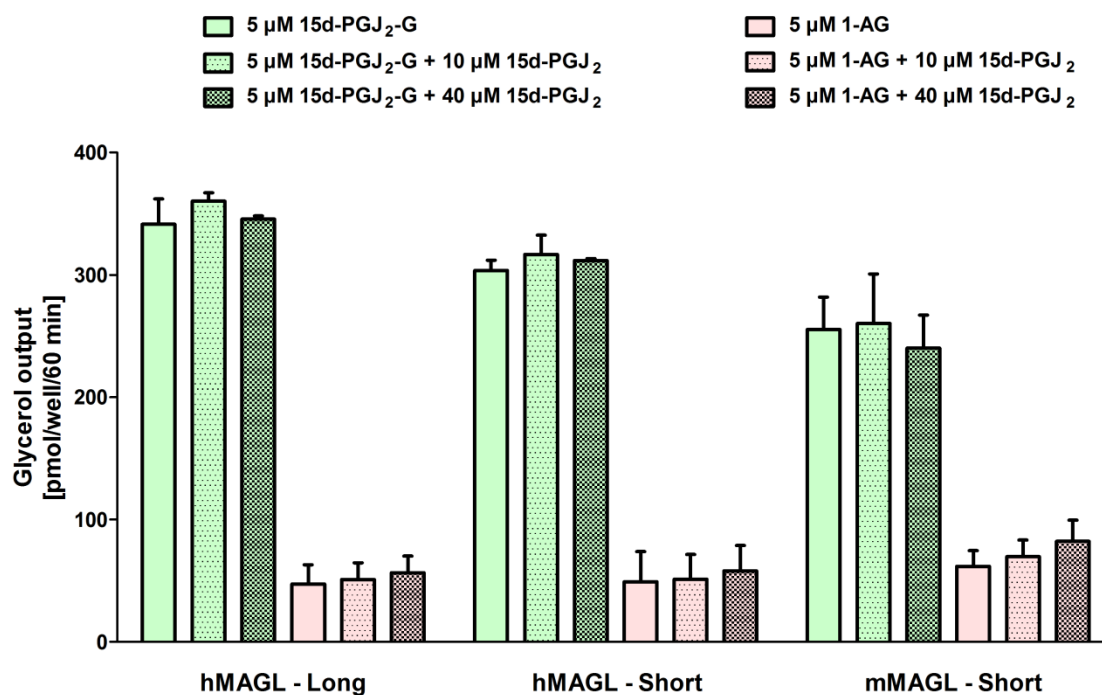

**Supplemental Figure 3.** No inhibition of MAGL isoforms by the 15d-PGJ<sub>2</sub>-G hydrolysis end-product 15d-PGJ<sub>2</sub>. Lysates (0.3  $\mu$ g/well) of HEK293 cells transiently overexpressing human MAGL-long (313 aa), human MAGL-short (303 aa) and mouse MAGL-short (303 aa) isoforms were incubated together with the indicated substrates (15d-PGJ<sub>2</sub>-G or 1-AG, 5  $\mu$ M final concentration) in the presence or absence of the indicated concentrations of 15d-PGJ<sub>2</sub>. Glycerol output was determined at time-point 60 min. Data are mean + S.D. of duplicate wells from two independent experiments. There were no statistically significant differences in the substrate utilization in the absence or presence of 15d-PGJ<sub>2</sub> (one-way analysis of variance followed by Tukeys multiple comparisons).

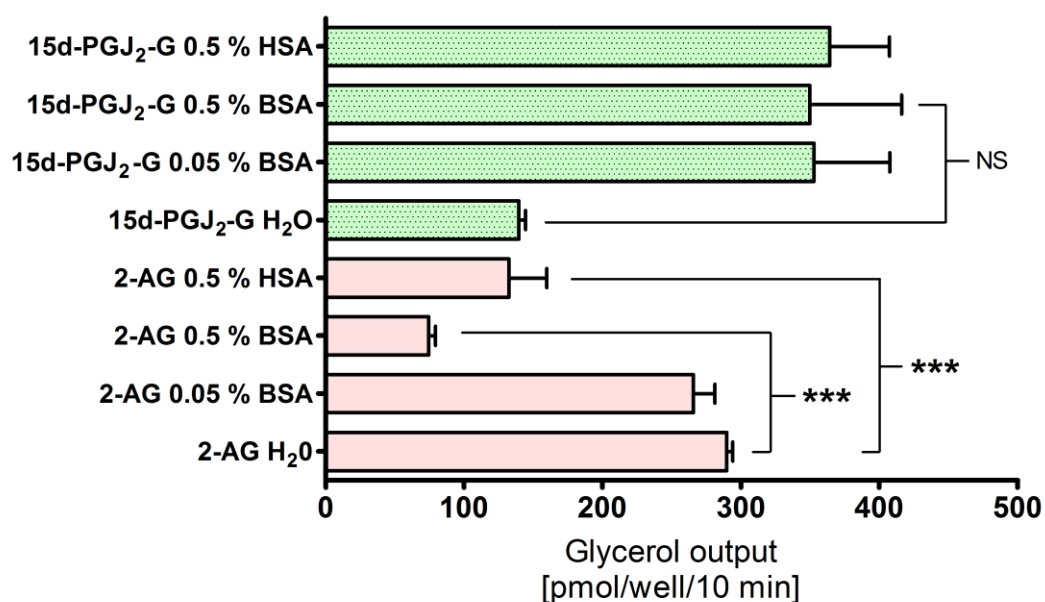

**Supplemental Figure 4.** Substrate availability for MAGL-catalyzed hydrolysis in incubations with or without bovine (BSA) or human serum albumin (HSA). Lysates (0.3 µg/well) of HEK293 cells transiently overexpressing hMAGL (long isoform) were incubated together with the indicated substrates (25 µM final concentration) in the presence or absence (H<sub>2</sub>O) of the indicated albumin concentrations (w/v). Glycerol output was determined at time-point 10 min. Data are mean + S.E.M. of duplicate wells and combined from three independent experiments. Statistical comparisons were done using one-way analysis of variance, followed by Tukeys multiple comparisons and the significance indicated with an asterix (\*\*\*) p < 0.001).
